# Supplementary material for: Terahertz metal-oxide-semiconductor transistors based on aligned carbon nanotube arrays
Source: Research Square preprint supplement (doi:10.21203/rs.3.rs-2526224/v1), 2023-03-30
Supplement: Supplementary file 1 [file da94f6552b8c7ba51e160bfc.docx]

Extended Data for

**Terahertz metal-oxide-semiconductor transistors based on aligned carbon nanotube arrays**

Jianshuo Zhou1, Li Ding1, *, Lin Xu1, Xiaohan Cheng1,2, Zipeng Pan1,Haitao Li1, Maguang Zhu1,Lijun Liu1, Huiwen Shi1,2, Zhiyong Zhang1,2,3,4,* and Lian-Mao Peng1,2,3,*

1 Key Laboratory for the Physics and Chemistry of Nanodevices and Center for Carbon-based Electronics, School of Electronics, Peking University, Beijing 100871, China. 2 Academy for Advanced Interdisciplinary Studies, Peking University, Beijing 100871, China

3 Hunan Institute of Advanced Sensing and Information Technology, Xiangtan University, Hunan 411105, China

4 Frontiers Science Center for Nano-optoelectronics, Peking University, Beijing 100871, China

* Correspondence to: [lding@pku.edu.cn](mailto:lding@pku.edu.cn), [zyzhang@pku.edu.cn](mailto:zyzhang@pku.edu.cn), [lmpeng@pku.edu.cn](mailto:lmpeng@pku.edu.cn)


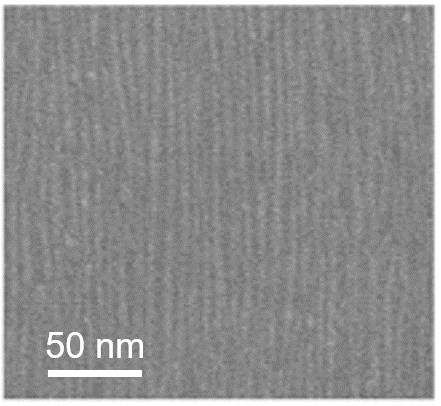


**Extended Data Fig. 1 |** Scanning electron microscope (SEM) image showing as-deposited A-CNT array film.

**b**

**c**

**a**


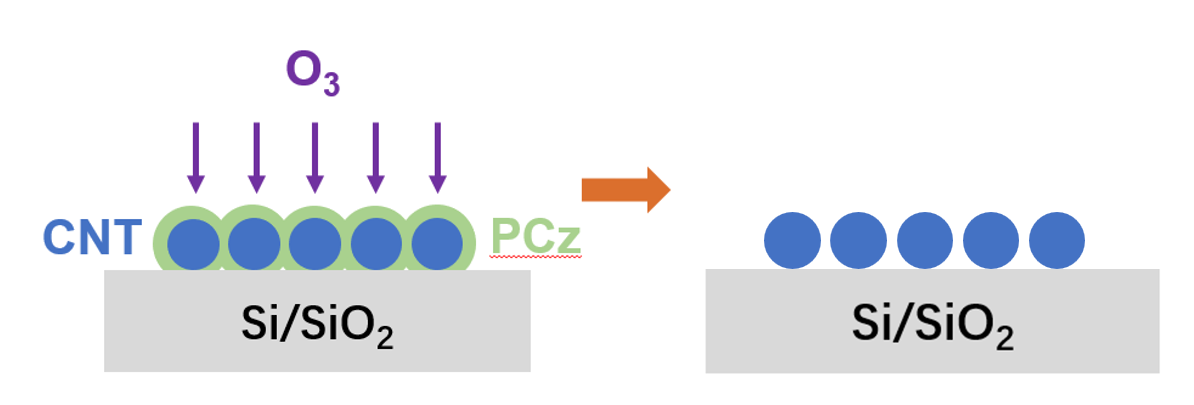


**Extended Data Fig. 2 |** **a**, Schematic diagram of UVO cleaning. **b**, Transfer characteristic curves of eight 80 nm-*L*g CNT transistors with *V*ds of -1.0 V, among which four of the devices are UVO-processed, the others are not. **c**, Peak transconductance (*g*m) curves of eight 80 nm-*L*g CNT transistors with *V*ds of -1.0 V, among which four of the devices are UVO-processed, the others are not.

**Extended Data Fig. 3 |** Comparison of saturated velocity of transistors in this work and previous works based on CNT and other materials.


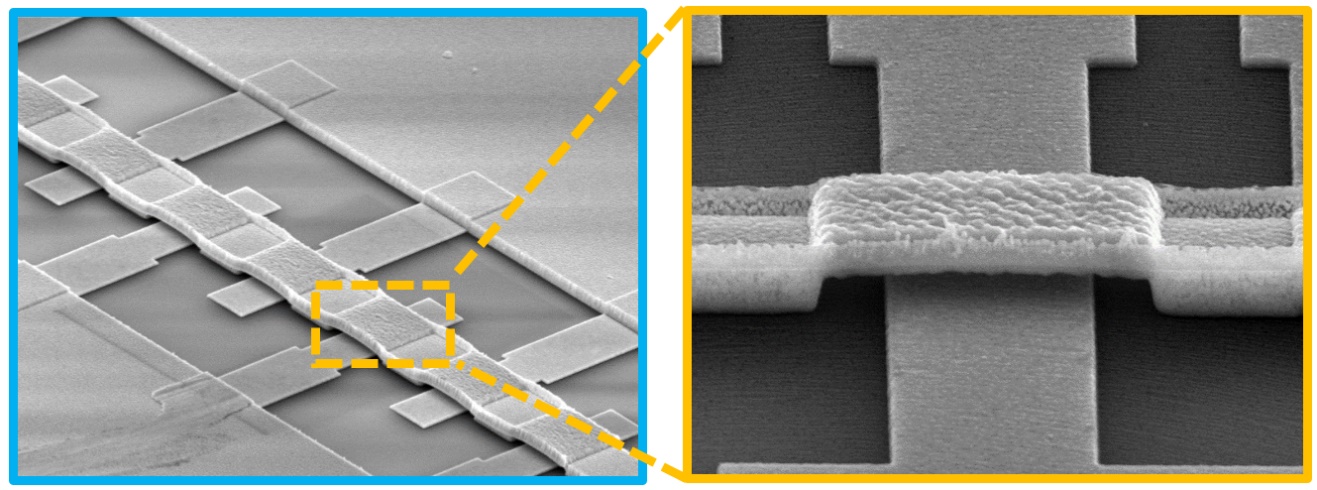
**Extended Data Fig. 4 |** Scanning electron microscope (SEM) images showing an air-bridge jumper structure.


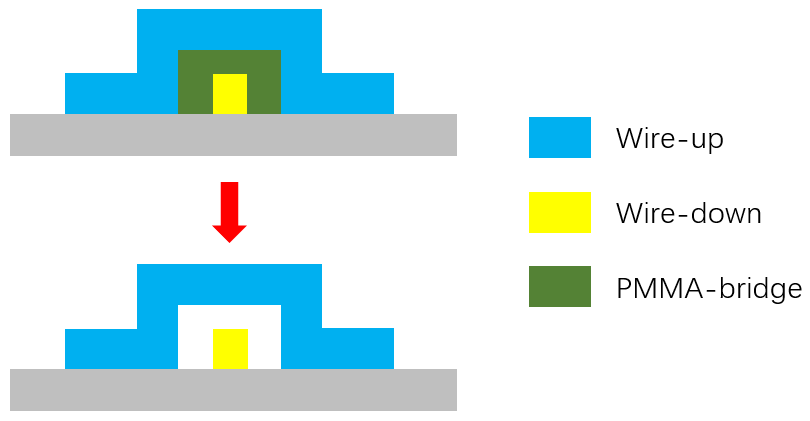


**Extended Data Fig. 5 |** Jumper connection structure improvement of CNT high-speed FETs. Schematic diagram of structure improvement.

**Extended Data Fig. 6 |** Intrinsic current gain and power gain versus frequency of the 35-nm-*L*g champion RF transistor. The slope of the extension lines is −20 dB/dec.

**Extended Data Table 1 |** **Comparison of physical dimension of different device structures (T-gate in ref 4, T-gate used in this work, Y-gate used in this work), considering *L*g, *L*ch, *T*cap and *T*height.**

| **Ref** | ***L*g (nm)** | ***L*ch (nm)** | ***T*cap (nm)** | ***T*height (nm)** |
| --- | --- | --- | --- | --- |
| **This work, Y-gate** | **35** | **100** | **370** | **400** |
| **This work, T-gate** | **35** | **150** | **300** | **320** |
| **[4]** | **110** | **160** | **250** | **240** |


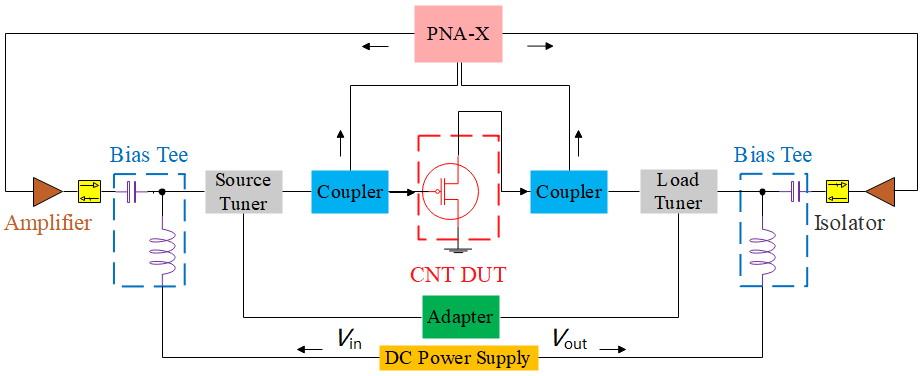


**Extended Data Fig. 7 |** Schematic of CNT RF amplifier with measurement setup using load-pull system to characterize the power gain, output power (*P*out) and linearity (*P*1dB output).


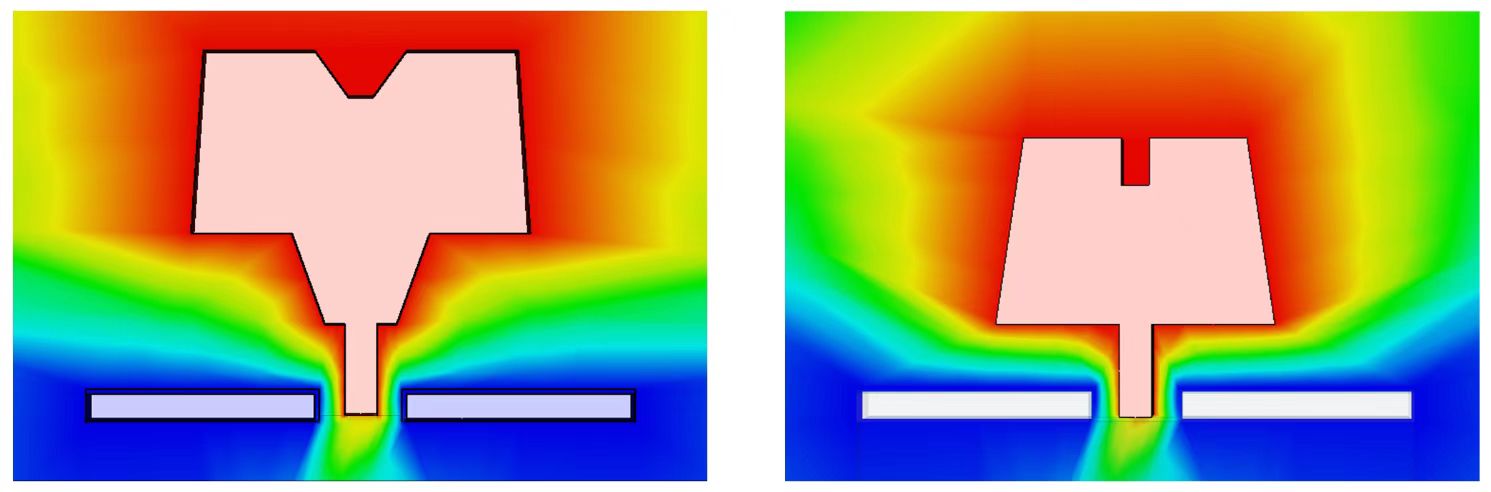


**Extended Data Fig. 8 |** Potential distributions of Y-gate (left) and T-gate (right) devices, where the right one includes T-gate structure used in this work, and T-gate structure used in ref 4, simulated via CST Studio Suite.

**
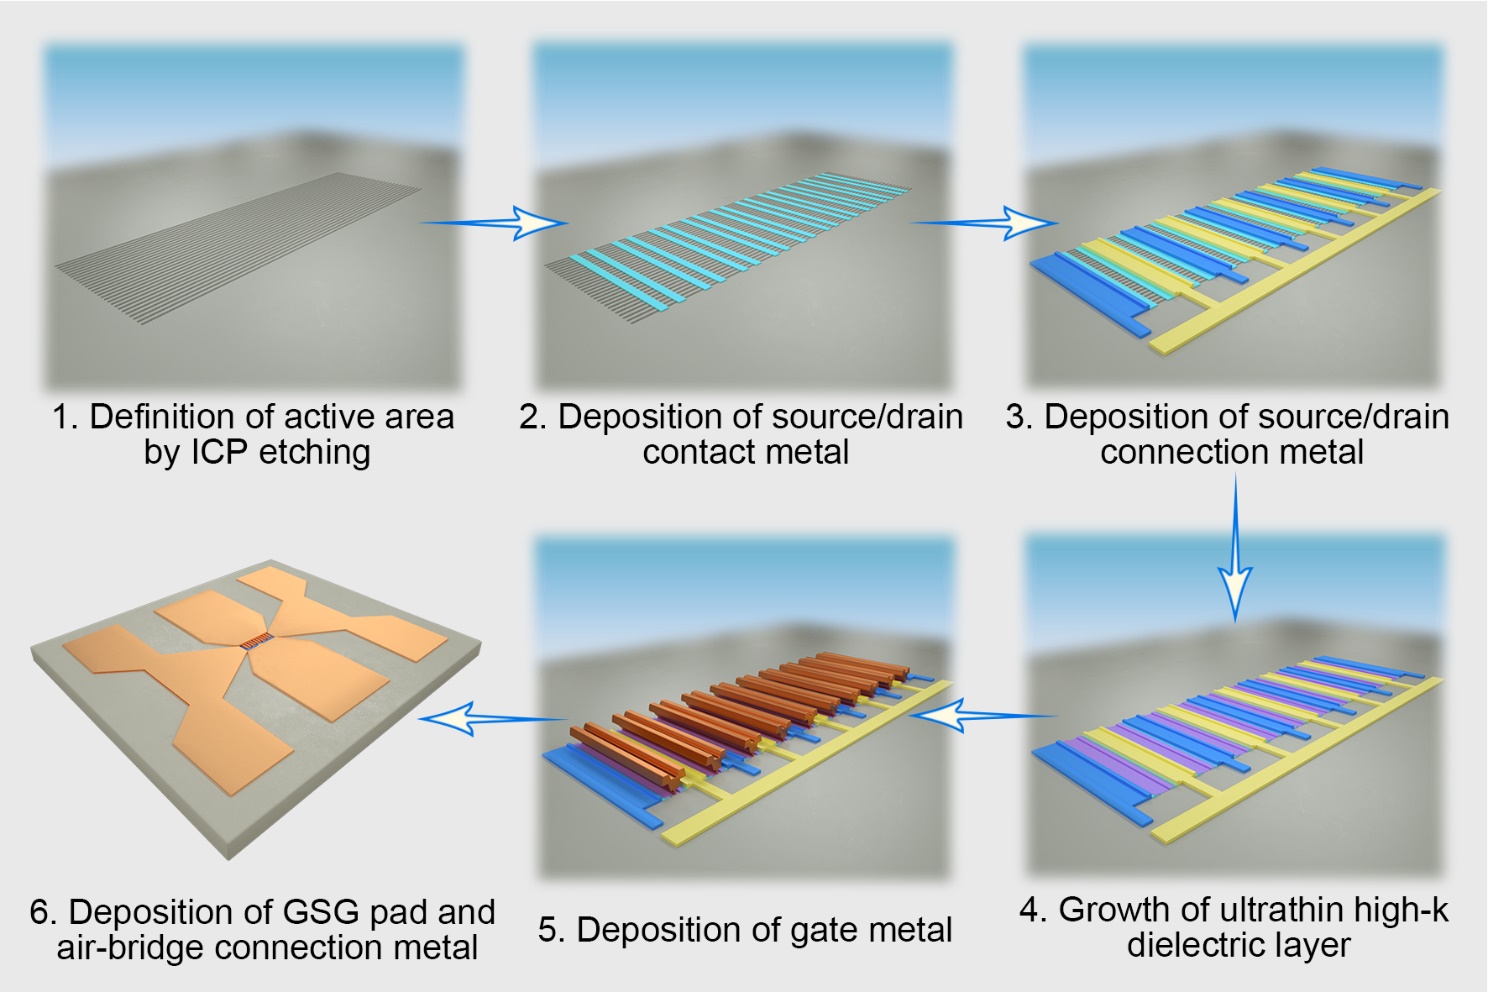
**

**Extended Data Fig. 9 |** Schematic diagram showing the fabrication process of high-speed CNT transistors. See methods for process details.


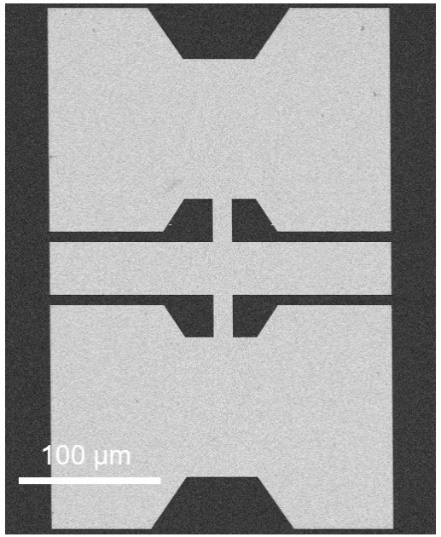

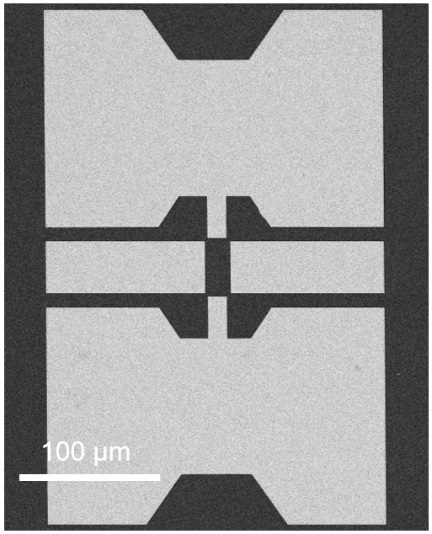


**a**

**b**

**Extended Data Fig. 10 | Structures of ‘Open’ and ‘Short’ for de-embedding. a**, Extrinsic Open structure. The scale bar is 100 μm. **b,** Extrinsic Short structure. The scale bar is 100 μm. Extrinsic Open/Short structures were fabricated through using a blank square area/ a metal-deposited square area to replace the transistor region.

**Extended Data Fig. 11 | S-parameters of ‘Open’ and ‘Short’ structures.** Scanning frequencies were from 100 MHz to 50 GHz with a linear step of 100 MHz.

**The extraction of *f*T and *f*max via S-parameters**

The *f*T is defined as the frequency when current gain (*H*21) reaches unity (0 dB), while *f*max is defined as the frequency when power gain (*G*max) reaches 0 dB.The current gain (*H*21) and power gain (*G*max) can be calculated using S-parameters by the following equations：

, (1)

, (2)

respectively, where *K* is the stability factor and given by

. (3)

As for the de-embedding performance, the de-embedding process includes: (a) Convert S-parameters of a RF transistor, open structure, and short structure to Y-parameters using the equation shown in Table S3; (b) Calculate de-embedding Y-parameters by

(4)

where, *Y*DUT, *Y*OPEN, and *Y*SHORT represent the Y-parameters of a RF transistor, open structure, and short structure; Convert *Y*De-embedding to *S*De-embedding using the equation shown in Table S3; (c) Calculate current gain (*H*21) and power gain (*G*max) from *S*De-embedding; Extract de-embedding *f*T and *f*max.

**Extended Data Table 2 | Conversions between Y-parameters and S-parameters.**

| Y converted from S | S converted from Y |
| --- | --- |
|  |  |
|  |  |
|  |  |
|  |  |

Which, ,.

**
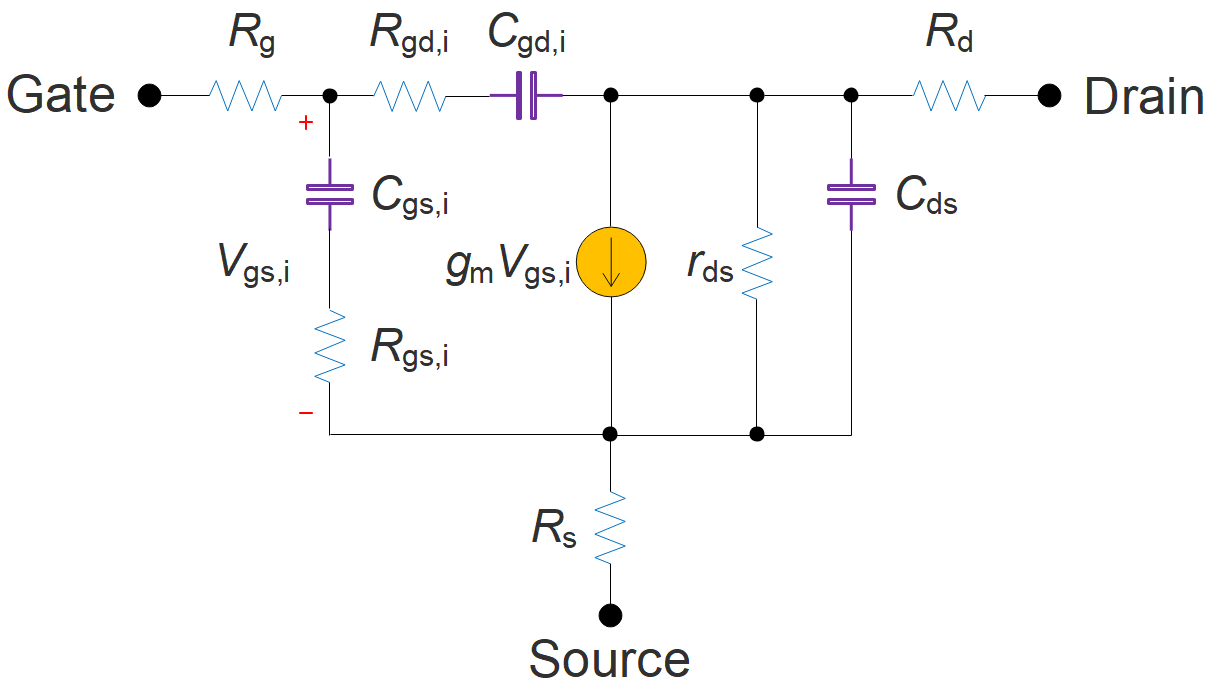
**

**Extended Data Fig. 12 | Small-signal equivalent circuit modelling for the CNT transistor.** Intrinsic gate-to-source capacitance, intrinsic gate-to-drain capacitance, drain-to-source capacitance, transconductance, the voltage on *C*gs,i divided from gate-to-source voltage and drain-to-source output differential resistance are represented by *C*gs,i, *C*gd,i, *C*ds, *g*m, *V*gs,i and *r*ds, respectively. Source serial resistance, drain serial resistance and gate resistance are represented by *R*s, *R*d and *R*g, respectively.

**Extended Data Table 3 | Device parameters for CNT RF transistor**

| *L*g(nm) | *C*gs(fF) | *C*gd(fF) | *C*ds(fF) | *R*g(Ω) | *R*s(Ω) | *R*d(Ω) | *R*ds(Ω) | *g*m(mS) |
| --- | --- | --- | --- | --- | --- | --- | --- | --- |
| 35 | 9.64 | 2.57 | 3.76 | 3.4 | 5.19 | 7.67 | 45 | 158 |

The *R*g, *C*gs, *C*gd, *G*ds, *g*m and *R*ds were calculated according to equations (S1-S5).

(S1)

(S2)

(S3)

(S4)

(S5)

**Extended Data Fig. 13 |** Comparison of *f*MAX extracted by -20 dB/dec extrapolation from Mason’s Unilateral Power Gain (U) terminus and simulated maximum stable gain (solid line). The parameter values of the CNT RF transistor are given in Extended Data Table 2.

**Extended Data Fig. 14 |** Output power versus input power curves for a single-tone test at a measurement frequency of 30 GHz, with the maximum output power matching using a load-pull system. *P*out max is the measured maximum output power. For this figure, the bias condition is (*V*gs,*V*ds) = (0.3,−1.6) V.

**Extended Data Fig. 15 |** Comparison of the simulation results (lines) with measured transfer curves (dots) of a CNT FET.

**References**

1. Vig, John R. "UV/ozone cleaning of surfaces." Journal of Vacuum Science & Technology A: Vacuum, Surfaces, and Films 3.3 (1985): 1027-1034.
2. Mei, Xiaobing, et al. "First demonstration of amplification at 1 THz using 25-nm InP high electron mobility transistor process." IEEE Electron Device Letters 36.4 (2015): 327-329.
3. Shi H, Ding L, Zhong D, et al. Radiofrequency transistors based on aligned carbon nanotube arrays[J]. Nature Electronics, 2021, 4(6): 405-415.
4. Liu, L. et al. Aligned, high-density semiconducting carbon nanotube arrays for high-performance electronics. Science 368, 850–856 (2020).
5. Rutherglen, C. et al. Wafer-scalable, aligned carbon nanotube transistors operating at frequencies of over 100 GHz. Nature. Nat. Electron. 2, 530–539 (2019).
6. Passi V, Raskin J P. Review on analog/radio frequency performance of advanced silicon MOSFETs[J]. Semiconductor Science and Technology, 2017, 32(12): 123004.
